# Supplementary material
Source: Springer Nature journal article supplement (https://www.springermedizin.de/resource/supplementary/12955_2009_633_MOESM3_ESM.pdf/9560850)
Supplement: MOESM3 [file 9560850]

Figure 2

## APCA African POS

| PATIENT NO. _____                                                                                                                 | POSSIBLE RESPONSES                                                        |
|-----------------------------------------------------------------------------------------------------------------------------------|---------------------------------------------------------------------------|
| <b>ASK THE PATIENT</b>                                                                                                            |                                                                           |
| <p><b>Q1.</b> Please rate your pain (from 0 = no pain to 5 = worst/overwhelming pain) during the last 3 days</p>                  | <p><b>0 (no pain)</b><br/><b>- 5 (worst/overwhelming pain)</b></p>        |
| <p><b>Q2.</b> Have any other symptoms (e.g. nausea, coughing or constipation) been affecting how you feel in the last 3 days?</p> | <p><b>0 (no, not at all)</b><br/><b>- 5 (overwhelmingly)</b></p>          |
| <p><b>Q3.</b> Have you been feeling worried about your illness in the past 3 days?</p>                                            | <p><b>0 (no, not at all)</b><br/><b>- 5 (overwhelming worry)</b></p>      |
| <p><b>Q4.</b> Over the past 3 days, have you been able to share how you are feeling with your family or friends?</p>              | <p><b>0 (no, not at all)</b><br/><b>- 5 (yes, I've talked freely)</b></p> |
| <p><b>Q5.</b> Over the past 3 days, have you felt that life was worthwhile?</p>                                                   | <p><b>0 (no, not at all)</b><br/><b>- 5 (yes, all the time)</b></p>       |

|                                                                                                              |                                                                    |
|--------------------------------------------------------------------------------------------------------------|--------------------------------------------------------------------|
|                                                                                                              |                                                                    |
| <b>Q6.</b> Over the past 3 days, have you felt at peace?                                                     | <b>0 (no, not at all)</b><br><b>- 5 (yes, all the time)</b>        |
| <b>Q7.</b> Over the past 3 days, have you had enough help and advice for your family to plan for the future? | <b>0 (no, not at all)</b><br><b>- 5 (as much as wanted)</b>        |
| <b>ASK THE FAMILY CARER</b>                                                                                  |                                                                    |
| <b>Q8.</b> Over the past 3 days, how much information have you and your family been given?                   | <b>0 (none)</b><br><b>- 5 (as much as wanted)</b><br><b>N/A</b>    |
| <b>Q9.</b> Over the past 3 days, how confident has the family felt caring for the Client?                    | <b>0 (not at all)</b><br><b>- 5 (very confident)</b><br><b>N/A</b> |
| <b>Q10.</b> Has the family been feeling worried about the Client over the last 3 days?                       | <b>0 (not at all)</b><br><b>- 5 (severe worry)</b><br><b>N/A</b>   |
